# Supplementary material for: Protecting benzylic C–H bonds by deuteration doubles the operational lifetime of deep blue Ir-phenylimidazole dopants in phosphorescent OLEDs
Source: Research Square preprint supplement (doi:10.21203/rs.3.rs-98832/v1), 2020-11-12
Supplement: Supplementary file 1 [file c61aa2a54eabd37a7dd33310.docx]

**Supplementary Information**

**Protecting benzylic C–H bonds by deuteration doubles the operational lifetime of
deep blue Ir-phenylimidazole dopants in phosphorescent OLEDs**

Hye Jin Bae1, Jong Soo Kim1, Alexander Yakubovich2, Jinhoon Jeong4,5, Sangho Park1, Jun Chwae1, Satoko Ishibe1, Won-Joon Son3, Yongsik Jung1, Sunghan Kim1, Hyeonho Choi1,*, and Mu-Hyun Baik4,5,*

1Samsung Advanced Institute of Technology (SAIT), Samsung Electronics Co., Ltd., 130 Samsung-ro, Suwon, 16678, Republic of Korea

2Samsung R&D Institute Russia (SRR), Samsung Electronics Co., Ltd., 12 Dvintsev Street, Moscow 127018, Russia

3Data and Information Technology (DIT) Center, Samsung Electronics Co., Ltd., Hwaseong, 18448, Republic of Korea

**4**Department of Chemistry, Korea Advanced Institute of Science and Technology (KAIST), Daejeon 34141, Republic of Korea

**5**Center for Catalytic Hydrocarbon Functionalizations, Institute for Basic Science (IBS), Daejeon 34141, Republic of Korea

E-mail: hono.choi@samsung.com; mbaik2805@kaist.ac.kr

**Experimental procedure**

The bis(1,5-cyclooctadiene)iridium(I) tetrafluoroborate was purchased from Colonial Metals Inc. The starting materials based phenylimidazole ligands 2-bromo-1-(4-(tert-butyl)-2,6-dimethylphenyl)-1H-imidazole, 2-bromo-1-(4-(tert-butyl)-2,6-dimethylphenyl)-1H-imidazole(d), 2-bromo-1-mesityl-1H-imidazole, 2-bromo-1-mesityl-1H-imidazole(d), 2-bromo-1-(2,6-diisopropylphenyl)-1H-imidazole, 2-bromo-1-(2,6-diisopropylphenyl)-1H-imidazole(d), 2-methyl-5-(4,4,5,5-tetramethyl-1,3,2-dioxaborolan-2-yl)benzonitrile, 2-methyl-5-(4,4,5,5-tetramethyl-1,3,2-dioxaborolan-2-yl)benzonitrile(d) were purchased from HANCHAM. All other Chemicals were purchased from Commercial sources (Sigma-Aldrich Co., Tokyo Chemical Industry Co.) and used without further purification. NMR spectra were recorded on a Bruker ASCEND 500 at 500 MHz for 1H and 13C using deuterated solvent CD2Cl2. Elemental analyses were performed on a PE 2400 Series Ⅱ (PerkinElmer) by the Environmental Analysis Laboratory at Samsung Advanced Institute of Technology. The MLADI-TOF mass spectra were obtained using a Bruker Ultraflex III TOF/TOF 200 spectrometer. The Ultraviolet–Visible (UV-Vis) absorption spectra and phosphorescence PL spectra were recorded on a Varian model UV-Vis-NIR spectrophotometer 5000 and a HITACHI F7000 spectrometer. Thermogravimetric analysis (TGA) was done by a TA Discovery instrument under nitrogen at a heating rate of 10oC min1. Emission lifetimes were measured on Fluo time 300. The cyclic voltammetry (CV) were performed in nitrogen-purged DMF with a three-electrode cell configuration composed a carbon working electrode, a platinum wire counter electrode, and a saturated Ag/AgCl as a reference electrode. Ferrocene was used as the standard reference. Purity & Mass of the dopants was examined by performing Liquid Chromatograph Mass Spectrometer-Ion Trap-Time of Flight (LCMS-IT-TOF) analyses. The LCMS-IT-TOF consisted of LC-30A Nexera SR system instrument (Shimadzu) connected to a hybrid mass spectrometer IT-TOF equipped with an electrospray ionization source. FT-IR spectra were measured on a Varian 670infrared spectrophotometer.

**Synthesis**

***General procedure : synsthesis of tris(1-(4-(tert-butyl)-2,6-dimethylphenyl)-2-(3-cyanophenyl)-1H-imidazole)iridium(Ⅲ) (Ir1) as a representative.***

3-(1-(4-(tert-butyl)-2, 6-dimethylphenyl)-1H-imidazol-2-yl)benzonitrile (**Ir1L**) (6.0 g, 18.21 mmol) and Ir(COD)2BF4 (2.27 g, 4.55 mmol) were added into NMP (1-methyl-2-pyrrolidinone) (60 mL) at room temperature under N2. The reaction solution was stirred at 180 oC for 4 hours. After cooling to room temperature, water was added to quench the reaction and the aqueous layer was extracted with CH2Cl2 (3 × 30 mL). The organic layer was dried over MgSO4. The crude product was purified by column chromatography (eluent: dichloromethane: n-hexane = 9:1) to afford a yellow solid (1.7 g, 32%). 1H NMR (500 MHz, CD2Cl2): δ (ppm) 7.33 (s, 3H), 7.32 (s, 3H), 6.93 (d, *J* = 1.4 Hz, 3H), 6.80, 6.81 (ABq, *JAB* =7.3 Hz, 6H), 6.76 (d, *J* = 1.4 Hz, 3H), 6.25 (s, 3H), 2.10 (s, 9H), 1.85 (s, 9H), 1.40 (s, 27H); 13C NMR (126 MHz, CD2Cl2): 169.2, 154.9, 154.2, 138.1, 137.8, 135.9, 135.3, 133.2, 131.3, 126.8, 126.7, 126.5, 124.3, 121.8, 121.4, 102.6, 31.6, 18.2, 17.9; MALDI-TOF/MS: 1177.42 [(M + H)+]. Anal. Calcd. for C66H66IrN9 : C, 67.32; H, 5.65; N, 10.71. Found : C, 66.8; H, 5.7; N, 10.8

Synthesis of tris(1-mesityl-2-(3-cyanophenyl)-1H-imidazole)iridium(Ⅲ) (**Ir2)**. The compound was prepared in the same procedure as of **Ir1** (1.5 g, 25%). 1H NMR (500 MHz, CD2Cl2): δ (ppm) 7.13 (br. s, 3H), 7.12 (br. s, 3H), 6.87 (d, *J* = 1.5 Hz, 3H), 6.80, 6.82 (ABq, *JAB* =7.6 Hz, 6H), 6.73 (d, *J* = 1.4 Hz, 3H), 6.40 (br. s, 3H), 2.43 (s, 9H), 2.05 (s, 9H), 1.81 (s, 9H); 13C NMR (126 MHz, CD2Cl2): 169.4, 154.7, 140.6, 138.2, 137.8, 136.2, 135.6, 133.2, 131.4, 130.4, 130.3, 126.5, 124.1, 122.1, 121.5, 102.5, 21.5, 17.9, 17.7; MALDI-TOF/MS: 1051.32 [(M + H)+]. Anal. Calcd. for C45H29N5 : C, 65.12; H, 4.60; N, 11.99. Found : C, 65.1; H, 4.6; N, 12.2

Synthesis of tris(1-mesityl-2-(3-cyano-4-methylphenyl)-1H-imidazole)iridium(Ⅲ) (**Ir3)**. The compound was prepared in the same procedure as of **Ir1** (0.6 g, 18%). 1H NMR (500 MHz, CD2Cl2): δ (ppm) 7.14 (s, 3H), 7.11 (s, 3H), 1 6.71 (d, *J* = 1.4 Hz, 3H), 6.66 (s, 3H), 6.36 (s, 3H), 2.43 (s, 9H), 2.17 (s, 9H), 2.08 (s, 9H), 1.80 (s, 9H); 13C NMR (126 MHz, CD2Cl2): 169.5, 154.9, 140.9, 140.7, 139.2, 136.1, 135.6, 135.5, 133.4, 130.3, 130.2, 126.5, 124.3, 121.5, 120.8, 103.1, 21.5, 20.5, 18.0, 17.6; MALDI-TOF/MS: 1093.41 [(M + H)+]. Anal. Calcd. for C45H29N5 : C, 65.91; H, 4.98; N, 11.53. Found : C, 65.4; H, 4.9; N, 11.5

Synthesis of tris(1-(2,6-diisopropylphenyl)-2-(3-cyanophenyl)-1H-imidazole)iridium(Ⅲ) (**Ir4)**. The compound was prepared in the same procedure as of **Ir1** (1.1 g, 25%). 1H NMR (500 MHz, CD2Cl2): δ (ppm) 7.63 (t, *J* = 7.6 Hz, 3H), 7.43 (dd, *J* = 7.8, 1.2 Hz, 3H), 7.41 (dd, *J* = 7.8, 1.2 Hz, 3H), 6.98 (d, *J* = 1.4 Hz, 3H), 6.81 (dd, *J* = 7.9, 1.8 Hz, 3H), 6.80 (d, *J* = 1.5 Hz, 3H), 6.75 (d, *J* = 7.9 Hz, 3H), 6.27 (d, *J* = 1.8 Hz, 3H), 2.60 (septet, *J* = 6.8 Hz, 3H), 2.16 (septet, *J* = 6.8 Hz, 3H), 1.23 (d, *J* = 6.9 Hz, 9H), 1.01 (d, *J* = 6.8 Hz, 9H), 0.95 (d, *J* = 6.8 Hz, 9H), 0.95 (d, *J* = 6.9 Hz, 9H); 13C NMR (126 MHz, CD2Cl2): 169.2, 156.1, 146.8, 146.2, 138.3, 137.5, 133.1, 131.6, 131.2, 126.2, 125.6, 125.3, 125.2, 123.5, 121.2, 102.2, 29.2, 28.8, 24.8, 24.6, 23.5, 23.4; MALDI-TOF/MS: 1177.42 [(M + H)+]. Anal. Calcd. for C66H66IrN9 : C, 67.32; H, 5.65; N, 10.71. Found : C, 67.0; H, 5.6; N, 10.8

Synthesis of tris(1-(4-(tert-butyl)-2,6-dimethylphenyl)-2-(3-cyanophenyl)-1H-imidazole)iridium(Ⅲ)-d24 (**Ir1D**). The compound was prepared in the same procedure as of **Ir1** (1.3 g, 29%). 1H NMR (500 MHz, CD2Cl2): δ (ppm) 7.35 (d, *J* = 2.3 Hz, 3H), 7.33 (d, *J* = 2.2 Hz, 3H), 6.95 (s, 0.6H), 6.82, 6.82 (ABq, *JAB* =7.1 Hz, 6H), 6.78 (d, *J* = 1.4 Hz, 1H), 6.27 (s, 2.5H), 2.08-2.10 (m, 0.8H), 1.83-1.86 (m, 0.8H), 1.42 (s, 27H); 13C NMR (126 MHz, CD2Cl2): 169.2, 154.8, 154.8, 154.1, 138.1, 137.8, 137.7, 135.8, 135.7, 135.2, 135.2, 133.3, 131.2, 126.8, 126.7, 126.5, 126.4, 124.3, 121.9, 121.7, 121.4, 102.6, 102.5, 35.2, 31.6, 17.1-17.9 (m).; MALDI-TOF/MS: 1199.53 [(M + H)+].

Synthesis of tris(1-mesityl-2-(3-cyanophenyl)-1H-imidazole)iridium(Ⅲ)-d33 (**Ir2D)**. The compound was prepared in the same procedure as of **Ir1** (1.7 g, 27%). 1H NMR (500 MHz, CD2Cl2): δ (ppm) 7.13 (d, *J* = 1.9 Hz, 3H), 7.11 (d, *J* = 1.9 Hz, 3H), 6.88 (s, 0.7H), 6.81, 6.83 (ABq, *JAB* =7.5 Hz, 6H), 6.73 (s, 0.8H), 6.40 (s, 2.6H), 2.40-2.43 (m, 1.2H), 2.03-2.06 (m, 1.1H), 1.78-1.81 (m, 1.1H); 13C NMR (126 MHz, CD2Cl2): 169.3, 154.7, 154.7, 140.8, 140.7, 138.2, 137.8, 136.0, 135.5, 135.5, 133.3, 131.4, 130.4, 130.3, 126.3, 124.1, 122.0, 121.5, 102.5, 20.6-21.2 (m), 16.8-17.6 (m); MALDI-TOF/MS: 1079.51 [(M + H)+]. Anal. Calcd. for C45H29N5 : C, 84.48; H, 4.57; N, 10.95. Found : C, 84.4; H, 4.6; N, 11.0

Synthesis of tris(1-mesityl-2-(3-cyano-4-methylphenyl)-1H-imidazole)iridium(Ⅲ)-d42 (**Ir3D)**. The compound was prepared in the same procedure as of **Ir1** (0.7 g, 26%). 1H NMR (500 MHz, CD2Cl2): δ (ppm) 7.14 (d, *J* = 2 Hz, 3H), 7.11 (d, *J* = 2Hz, 3H), 6.83 (s, 0.6H), 6.71 (s, 0.8H), 6.6 (s, 3H), 6.36 (s, 2.2H), 2.38-2.42 (m, 0.7H), 2.13-2.15 (m, 0.9H), 2.03-2.05 (m, 0.7H), 1.78-1.80 (m, 0.7H); 13C NMR (126 MHz, CD2Cl2): 169.5, 154.9(, 154.9), 140.7, 140.6, 139.2, 136.0, 135.5, 135.4, 133.4, 130.2, 126.3, 124.2, 121.4, 120.9, 103.1(, 103.1), 20.6-21.0 (m), 19.5-20.1 (m), 16.6-17.4 (m); MALDI-TOF/MS: 1128.64 [(M + H)+].

Synthesis of tris(1-(2,6-diisopropylphenyl)-2-(3-cyanophenyl)-1H-imidazole)iridium(Ⅲ)-d51 (**Ir4D)**. The compound was prepared in the same procedure as of **Ir1** (0.8 g, 22%). 1H NMR (500 MHz, CD2Cl2): δ (ppm) 7.63 (t, *J* = 7.8 Hz, 0.8H), 7.4-7.42(br. d, 6H), 6.98 (s, 0.4H), 6.81 (dd, *J* = 7.9, 1.6 Hz, 3H), 6.80 (s, 1.3H), 6.76 (d, *J* = 7.9 Hz, 3H), 6.27 (d, *J* = 1.1 Hz, 2.9H), 2.57-2.63 (m, 0.5H), 2.13-2.19 (m, 0.5H), 1.19-1.24 (m,4.7H), 0.97-1.02 (m, 4.7H), 0.90-0.95 (m, 9.2H); 13C NMR (126 MHz, CD2Cl2): 169.2, 156.1, 156.1, 146.8, 146.2, 138.3, 137.6, 133.1, 131.6, 131.2, 126.1, 125.6, 125.5, 125.3, 125.2, 125.2, 123.5, 123.3, 121.2, 102.2, 28.5-28.8 (m), 24.7, 24.0-24.6 (m), 22.7-23.4 (m); MALDI-TOF/MS: 1207.59 [(M + H)+].


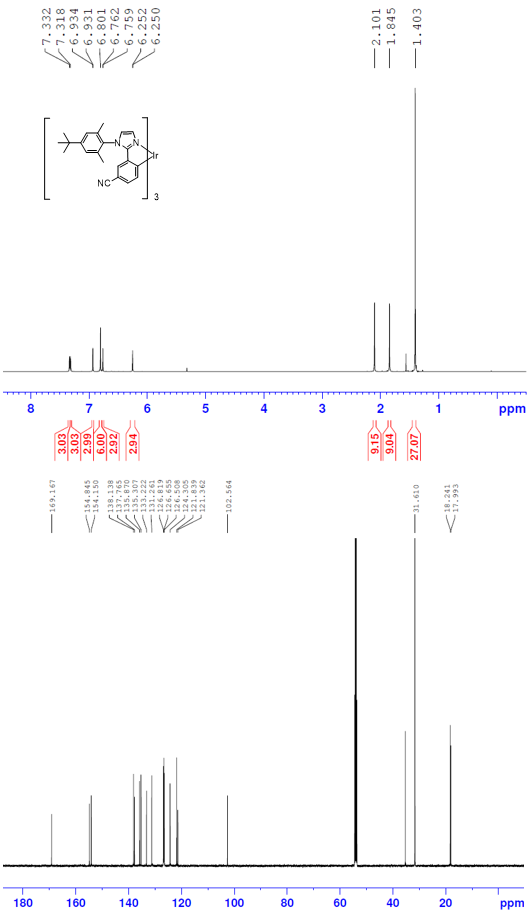


**Figure S1.** 1H (top) and 13C (bottom) spectrum of **Ir1**.


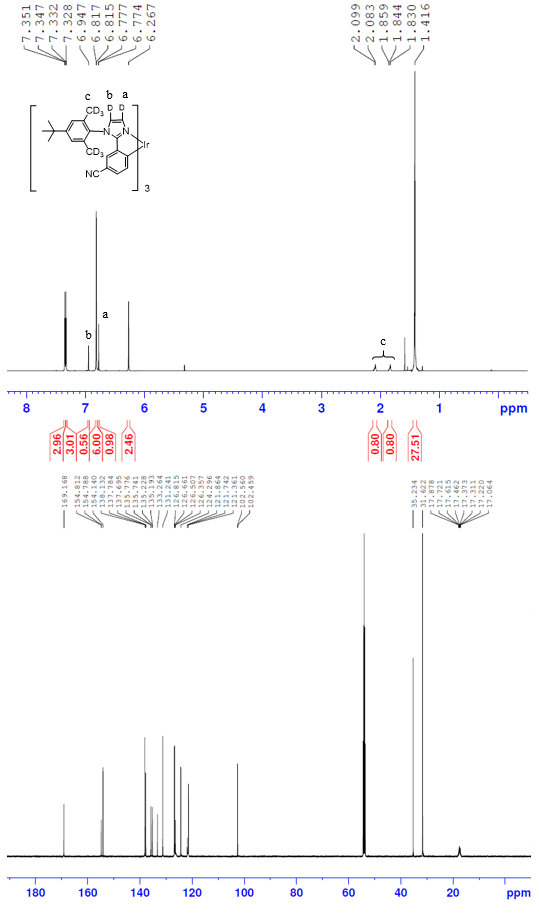


**Figure S2.** 1H (top) and 13C (bottom) spectrum of **Ir1D**.


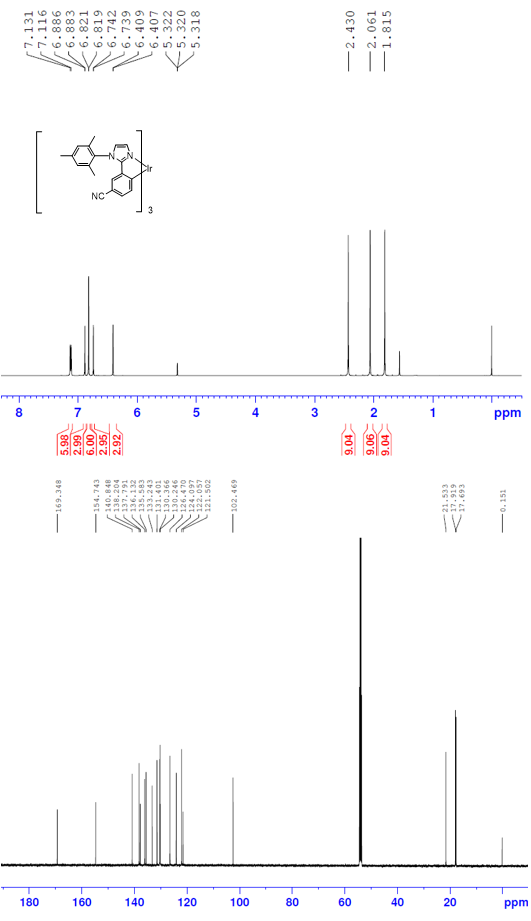


**Figure S3.** 1H (top) and 13C (bottom) spectrum of **Ir2**.


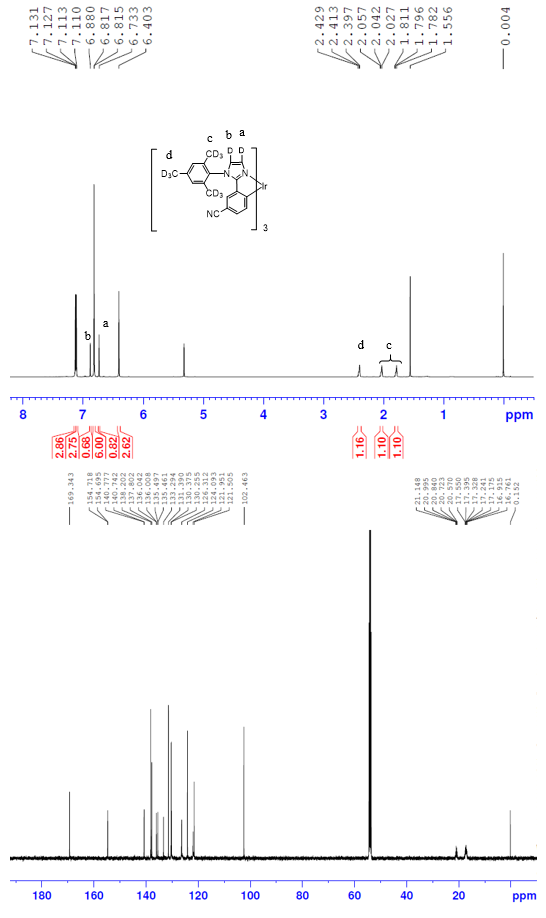


**Figure S4.** 1H (top) and 13C (bottom) spectrum of **Ir2D**.


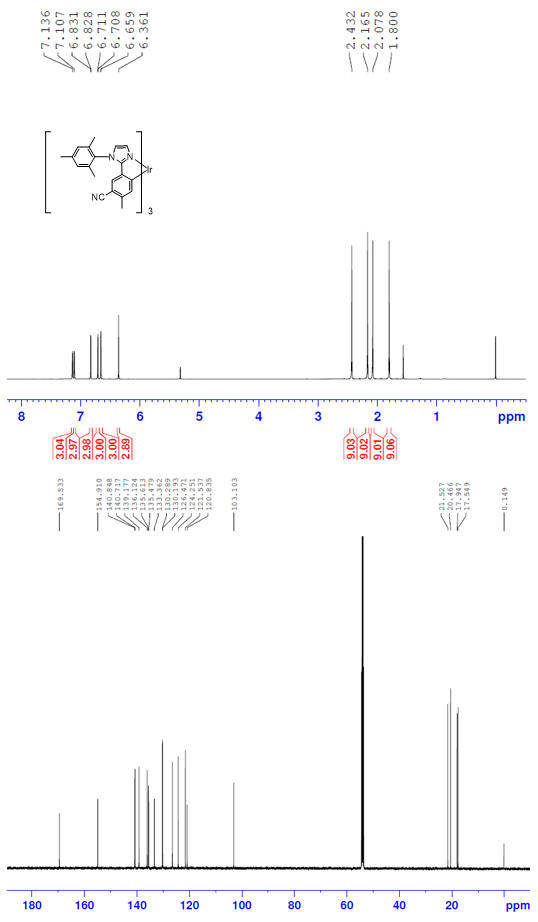


**Figure S5.** 1H (top) and 13C (bottom) spectrum of **Ir3**.


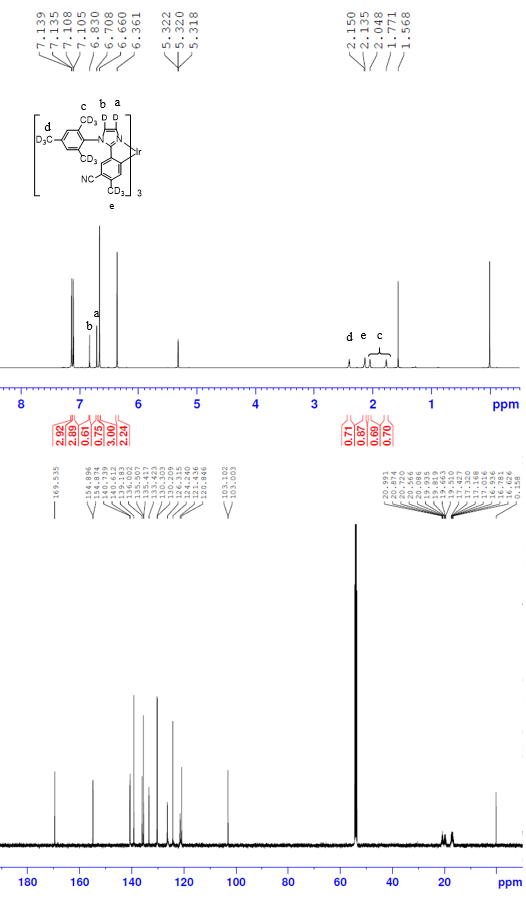


**Figure S6.** 1H (top) and 13C (bottom) spectrum of **Ir3D**.


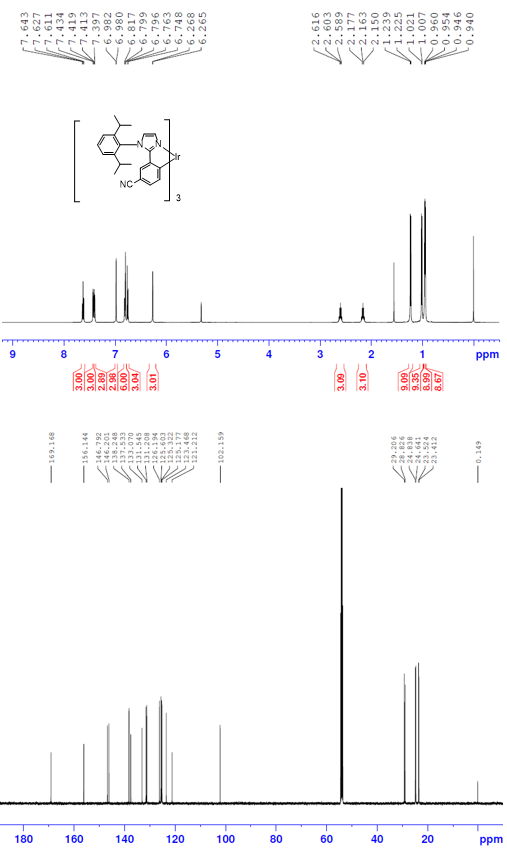


**Figure S7.** 1H (top) and 13C (bottom) spectrum of **Ir4**.


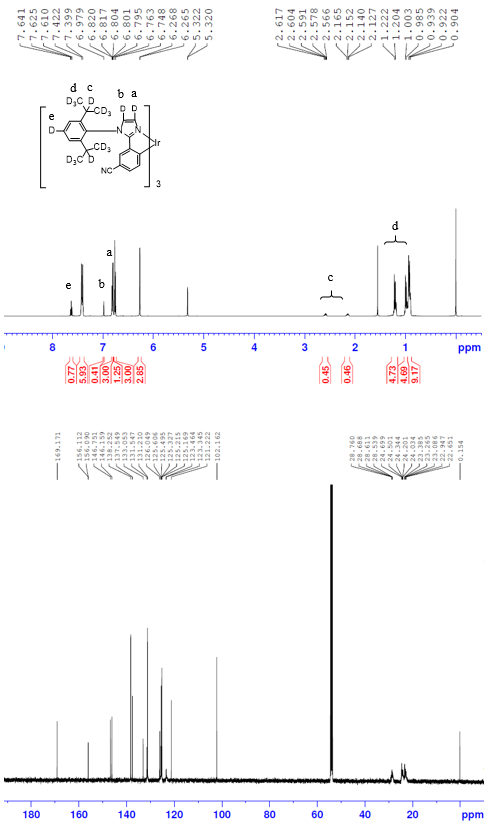


**Figure S8.** 1H (top) and 13C (bottom) spectrum of **Ir4D**.


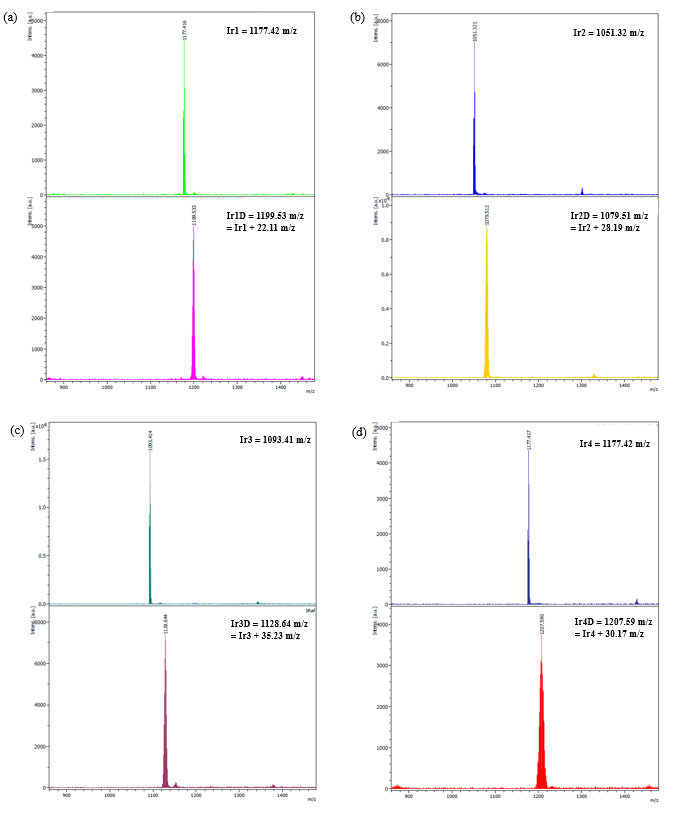


**Figure S9.** MALDI-TOF spectra (a) **Ir1**–**1D**,(b) **Ir2**–**2D** and(c) **Ir3**–**3D,** (d) **Ir4**–**4D**.


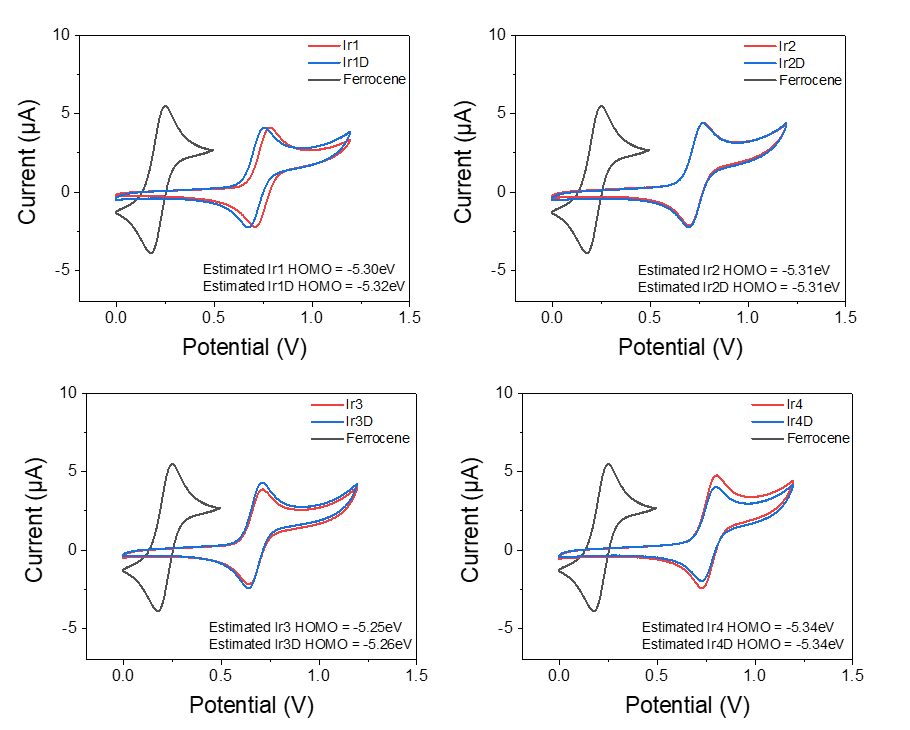


**Figure S10**. CV spectra of (a) **Ir1**–**1D**,(b) **Ir2**–**2D** and(c) **Ir3**–**3D,** (d) **Ir4**–**4D**.


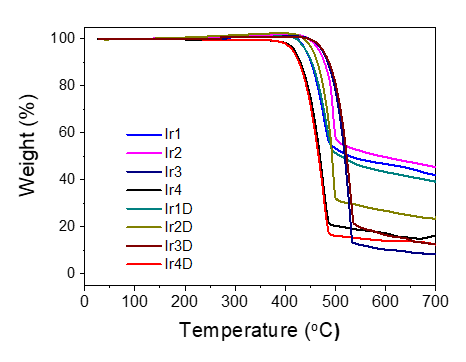


**Figure S11.** TGA curves of **Ir1**–**4** and **Ir1D**–**4D**.


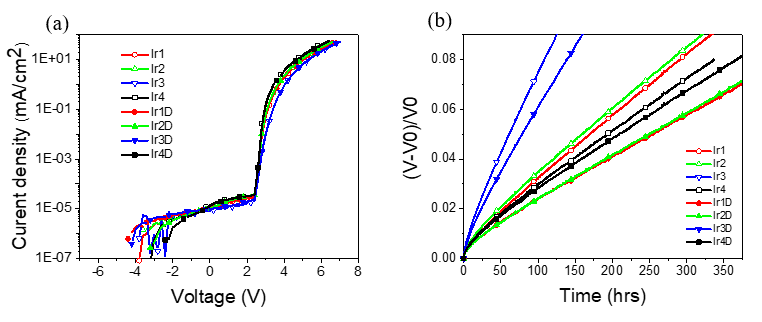


**Figure S12.** Device performances. (a) J-V-L characteristics, (b) normalized voltage rise during operational life time for each Ir complexes doped OLED devices.


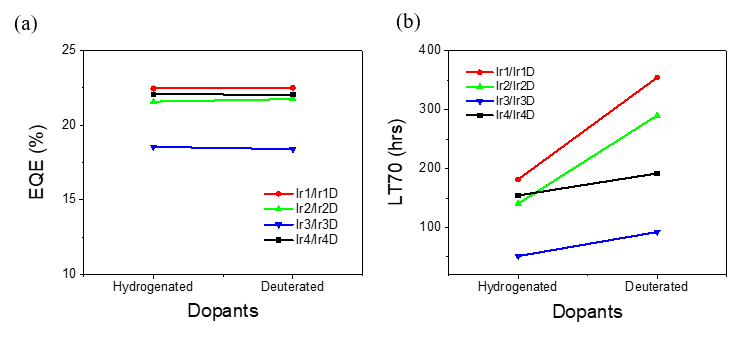


**Figure S13.** Summarized (a) EQE and (b) life time variation in accordance with substitution of deuteration for Ir complexes doped OLED devices.

**Computational Details**

The free energy in solution phase G(sol) has been calculated as follows:

G(sol) = G(gas) + G(solv)

G(gas) = H(gas) + TS(gas)

H(gas) = E(SCF) + ZPE

∆E(SCF) = ∑E(SCF) for products – ∑E(SCF) for reactants

∆G(sol) = ∑G(sol) for products – ∑G(sol) for reactants

G(gas) is the free energy in has phase; G(solv) is the free energy of solvation as computed using the continuum solvation model; H(gas) is the enthalpy in gas phase; T is the temperature; S(gas) is the entropy in gas phase; E(SCF) is the self-consistent field energy; ZPE is the zero-point energy.

**Table S1**. Computed energy components for DFT-optimized structures

|  | **E(SCF)/(eV)**  cc-pVTZ(-f) /LACV3P | **ZPE/(kcal/mol)**  LACVP** | **S(gas)/(cal/(mol*K))**  LACVP** | **G(solv)/(kcal/mol)**  LACVP** |
| --- | --- | --- | --- | --- |
| **1** | –20343.446 | 162.80 | 74.03 | –25.22 |
| **2** | –85707.905 | 737.42 | 330.84 | –15.12 |
| **2(D)** | –85707.905 | 735.38 | 331.53 | –15.12 |
| **TS** | –106050.795 | 898.71 | 390.10 | –32.40 |
| **TS(D)** | –106050.795 | 897.41 | 390.40 | –32.40 |
| **3** | –106050.885 | 900.66 | 395.22 | –32.93 |
| Energies for BDE calculations in eV | | | | |
| **H** (doublet) | –13.634 |  |  |  |
| **Ir1_1** (doublet) | –85691.631 |  |  |  |
| **Ir1_2** (doublet) | –85691.577 |  |  |  |
| **Ir1_3** (doublet) | –85692.947 |  |  |  |
| **Ir1_4** (doublet) | –85692.037 |  |  |  |
| **Ir1_5** (doublet) | –85692.059 |  |  |  |
| **Ir1_6** (doublet) | –85692.087 |  |  |  |
| **Ir1_7** (doublet) | –85692.012 |  |  |  |
| **Ir1_8** (doublet) | –85692.410 |  |  |  |
| **Ir2_T1** (triplet) | –76088.433 |  |  |  |
| **Ir2_1** (doublet) | –76072.213 |  |  |  |
| **Ir2_2** (doublet) | –76072.109 |  |  |  |
| **Ir2_3** (doublet) | –76073.472 |  |  |  |
| **Ir2_4** (doublet) | –76072.487 |  |  |  |
| **Ir2_5** (doublet) | –76072.524 |  |  |  |
| **Ir2_6** (doublet) | –76072.610 |  |  |  |
| **Ir2_7** (doublet) | –76072.541 |  |  |  |
| **Ir2_9** (doublet) | –76073.486 |  |  |  |
| **Ir3_T1** (triplet) | –79295.384 |  |  |  |
| **Ir3_1** (doublet) | –79279.175 |  |  |  |
| **Ir3_2** (doublet) | –79279.103 |  |  |  |
| **Ir3_3** (doublet) | –79280.448 |  |  |  |
| **Ir3_4** (doublet) | –79279.491 |  |  |  |
| **Ir3_5** (doublet) | –79279.528 |  |  |  |
| **Ir3_6** (doublet) | –79279.590 |  |  |  |
| **Ir3_9** (doublet) | –79280.461 |  |  |  |
| **Ir3_10** (doublet) | –79280.499 |  |  |  |
| **Ir4_T1** (triplet) | –85707.718 |  |  |  |
| **Ir4_1** (doublet) | –85691.466 |  |  |  |
| **Ir4_2** (doublet) | –85691.393 |  |  |  |
| **Ir4_3** (doublet) | –85692.857 |  |  |  |
| **Ir4_4** (doublet) | –85691.808 |  |  |  |
| **Ir4_5** (doublet) | –85691.785 |  |  |  |
| **Ir4_6** (doublet) | –85691.862 |  |  |  |
| **Ir4_7** (doublet) | –85691.813 |  |  |  |
| **Ir4_11** (doublet) | –85692.232 |  |  |  |
| **Ir4_12** (doublet) | –85691.801 |  |  |  |

In **2(D)** and **TS(D)**, a benzyl hydrogen participating in the H-abstraction reaction is deuterated.

In the denotation of “**IrX_N**” in BDE calculations, “**X**” means the number of iridium dopants and “**N**” indicates the position of the homolytically dissociated hydrogen. The “**IrX_T1**” means that T1 state of the **IrX**. (**Ir1_T1** is same with **2**)

**Figure S14**. HOMO/LUMO of **Ir1**–**4** in the ground state S0. (Isodensity value = 0.03 a.u.)

**Table S2**. Results on calculated HOMO/LUMO energy levels in the ground S0 state and spin density on Ir atom in T1 state are summarized

|  | **Ir1** | **Ir2** | **Ir3** | **Ir4** |
| --- | --- | --- | --- | --- |
| HOMO (eV) | –5.637 | –5.608 | –5.500 | –5.749 |
| LUMO (eV) | –1.376 | –1.318 | –1.200 | –1.456 |
| Spin density on Ir | 0.237 | 0.247 | 0.223 | 0.252 |


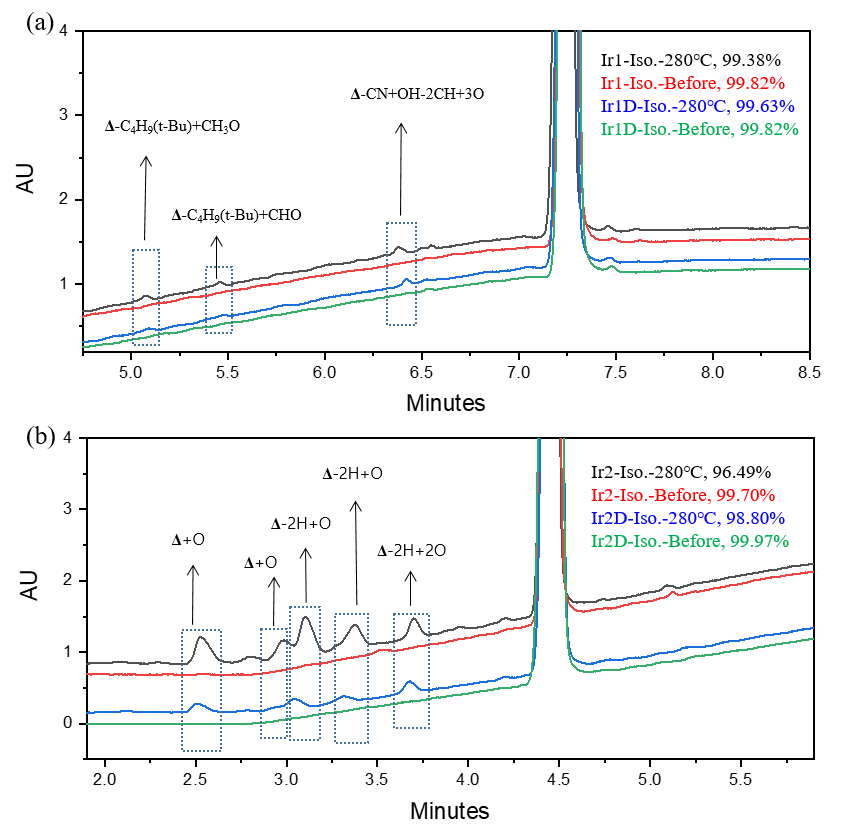


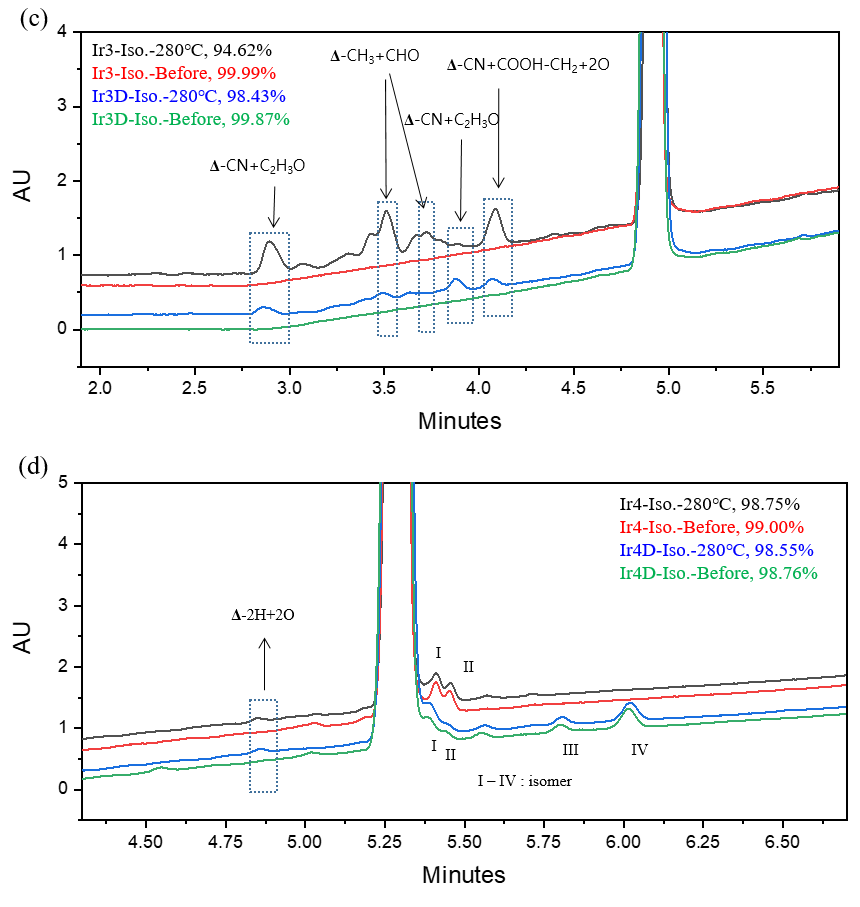


**Figure S15**. Before and after isothermal LC-MASS spectra and proposed mass assignments for the unknow impurities of (a) **Ir1**–**1D**, (b) **Ir2**–**2D** and (c) **Ir3**–**3D**, (d) **Ir4**–**4D**.

Figure S16 shows FT-IR spectra of hydrogenated Ir1–4 and deuterated Ir1D–4D. The C–H stretching frequencies of Ir1–4 observed at 2900~3100 cm–1. The C–D stretching frequencies of Ir1D–4D is expected to be observed ~2200 cm–1,but it is difficult to observe because it overlaps with the strong peak of C≡N stretching frequencies. It can be seen that the decrease of the C–H stretching frequencies of 2900~3100 cm–1 in the FT-IR spectra of Ir1D–4D is by deuterium. However, in the case of Ir1D, the decrease is small due to tert-butyl.


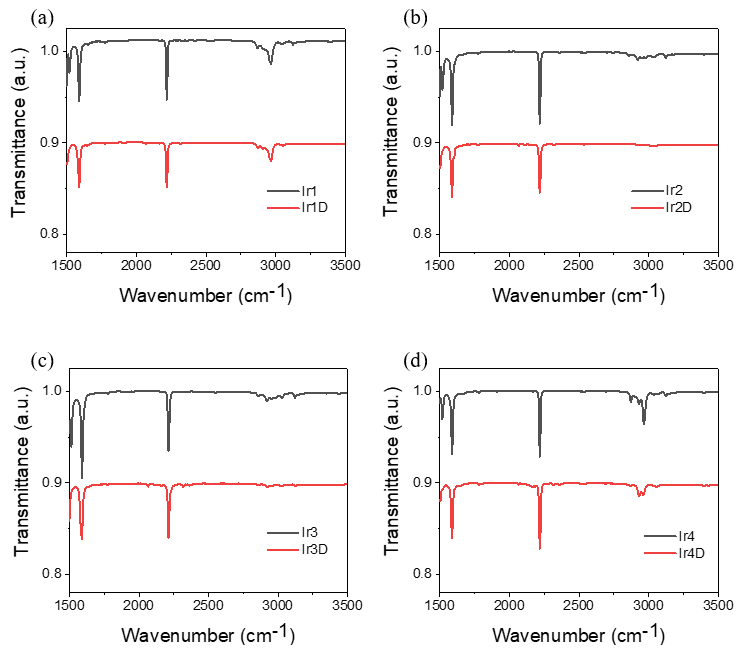


**Figure S16**. FT-IR spectra of (a) **Ir1**–**1D**, (b) **Ir2**–**2D** and (c) **Ir3**–**3D**, (d) **Ir4**–**4D**.

**Table S3**. Cartesian Coordinates of the Optimized Geometries.

===============================

**1**

===============================

N 0.356528401 -0.389536440 -1.581056595

C -0.668675959 -0.949274600 -0.833167493

C 1.071210623 0.498947352 -0.792095900

C -0.621479988 -0.412419051 0.475054681

C -1.588756561 -1.928524494 -1.213107347

C 0.498195767 0.519132197 0.501561344

C -1.538528919 -0.836333156 1.415877461

C 1.031366587 1.350123405 1.466490507

C 2.140494347 1.320366740 -1.155686975

C 2.129797697 2.156340361 1.122376919

H 0.613747299 1.391080976 2.467304945

C 2.668715000 2.144319296 -0.166363344

H 2.560772657 2.811313152 1.872912765

H 3.504695654 2.793314695 -0.403861821

H 2.534049511 1.325999260 -2.166089773

C -2.510235071 -2.335701466 -0.252892882

H -1.576356292 -2.364601135 -2.205845833

C -2.491088629 -1.797173977 1.035790086

H -3.247006416 -3.089770079 -0.507885456

H -3.219970226 -2.136705875 1.764822721

H -1.526674628 -0.447126925 2.428846598

C 0.629726768 -0.679009080 -2.933946133

C 1.930548668 -1.026706457 -3.313785315

C -0.406485140 -0.610811532 -3.871703386

C 2.188075542 -1.310631633 -4.647626877

C -0.129231930 -0.891337514 -5.202200413

C 1.163277268 -1.242144585 -5.591007233

H 2.710818768 -1.108828425 -2.563815594

H -1.399450779 -0.302467853 -3.560292482

H 3.188973188 -1.600581765 -4.950587273

H -0.920823932 -0.821835458 -5.941245079

H 1.372754931 -1.462651730 -6.633022308

===============================

**2**

===============================

N 0.382426322 1.730975151 0.083303362

C 1.245456696 1.366599798 -0.903022826

C -0.834913611 1.141653657 -0.186380833

C -0.673157215 0.429720998 -1.342504978

N 0.614191532 0.576922894 -1.767126679

H -1.387192965 -0.161848232 -1.895321012

H -1.683547497 1.292811155 0.462707311

C 2.630158663 1.722813129 -1.159859776

C 3.110867739 1.247260213 -2.416969299

C 3.440290213 2.450688839 -0.291518092

C 4.446203232 1.537948728 -2.738697767

C 4.760928631 2.725360870 -0.656235099

C 5.262277126 2.262719393 -1.882075548

H 3.071633577 2.811905861 0.661387086

H 4.837284565 1.207725763 -3.697125196

H 6.289891243 2.485965014 -2.155670643

C 5.572411537 3.487922430 0.234531403

N 6.203833103 4.115416050 0.982130408

C 0.649061441 2.664237022 1.129218817

C 0.537304163 4.031002045 0.843138993

C 1.103466511 2.192346573 2.360157490

C 0.934418201 4.927399635 1.829145193

C 1.490143299 3.134057045 3.316535711

C 1.438693047 4.506260395 3.065757990

H 0.875670791 5.989755630 1.606338978

H 1.870161057 2.767768145 4.264626980

N 4.082390785 -3.224612236 -3.397081614

C 3.555623293 -2.027040243 -3.878609419

C 3.481399298 -3.483652592 -2.185261488

N 2.619292974 -1.580114841 -2.957756996

C 2.591960430 -2.453613520 -1.939552188

H 3.723814011 -4.366947174 -1.614498496

H 1.950098276 -2.307460785 -1.082579255

C 3.824515820 -1.262246728 -4.993485928

C 3.013142347 -0.007733144 -5.077074051

C 4.761624813 -1.570016980 -6.038736343

C 3.172823668 0.785413802 -6.205718994

C 4.851968765 -0.734139502 -7.121045589

H 5.394727230 -2.446995258 -5.985911369

C 4.055539131 0.458037853 -7.240204811

H 2.598702908 1.705300689 -6.281453133

H 4.171967983 1.090515733 -8.113182068

N 6.526322842 -1.348067999 -8.998061180

C 5.776085854 -1.067607164 -8.155143738

C 6.352540493 -3.944290400 -3.857202530

C 4.984726906 -4.051060200 -4.118529320

C 4.489868164 -4.833796024 -5.170836926

C 7.235927105 -4.613271236 -4.706882477

C 5.408745766 -5.480107307 -5.990216255

C 6.791309357 -5.359654427 -5.800007343

H 8.299304962 -4.500027657 -4.522196293

H 5.029433727 -6.060792446 -6.827375412

Ir 1.779985070 0.247550741 -3.537452221

C -0.396883965 0.284430563 -5.469264984

N -1.204455018 -0.342764437 -6.366117954

C -1.069874883 -1.702538133 -6.169927597

N 0.223626196 -0.626621783 -4.724359035

C -0.177966326 -1.860538125 -5.145759106

H -1.613003016 -2.409362555 -6.778090477

H 0.202465221 -2.764155626 -4.693566799

C 0.938287973 1.912115932 -4.307790279

C -0.113377087 1.691204548 -5.244799614

C -0.793154478 2.743412971 -5.852689266

C 1.257051468 3.248566389 -4.019842625

C -0.437000543 4.057558060 -5.541724205

H -1.590775490 2.569935560 -6.565590858

C 0.590134382 4.307443619 -4.620412827

H 2.066631556 3.461164474 -3.327205181

H 0.862210631 5.334377289 -4.391679764

C -1.129299641 5.125840187 -6.184889793

N -1.706260085 5.977371693 -6.726367474

C -1.893941164 0.284268439 -7.448314190

C -1.160892963 0.605140924 -8.593731880

C -3.238208771 0.642755687 -7.297362804

C -1.801699042 1.342530727 -9.591697693

C -3.830470324 1.374145746 -8.322524071

C -3.126637220 1.761548042 -9.470959663

H -1.224006295 1.612232447 -10.469798088

H -4.867172718 1.677732587 -8.200149536

C -5.055202007 1.934579492 -11.063625336

C -3.811284065 2.650441647 -10.512215614

C -4.231837749 3.966126680 -9.832551003

C -2.887532473 2.987922192 -11.686231613

H -5.563915253 2.572610617 -11.795164108

H -4.781305790 0.997821569 -11.560792923

H -5.774791241 1.698114753 -10.273671150

H -4.701699257 4.634485722 -10.563179016

H -4.953655243 3.795301914 -9.027629852

H -3.369339228 4.483981133 -9.399869919

H -1.996806860 3.533898592 -11.357748032

H -2.566127539 2.089221478 -12.224305153

H -3.420166492 3.626159191 -12.398819923

C 1.955088973 5.549930573 4.057752132

C 0.814428329 6.508205414 4.436066151

C 2.496491909 4.912178040 5.339717388

C 3.096674919 6.338856697 3.390422583

H -0.006078423 5.968665123 4.921309948

H 1.178763866 7.272376060 5.131824493

H 0.406142116 7.024001122 3.561451197

H 2.853259087 5.695906162 6.015851021

H 1.724167228 4.344354153 5.870554924

H 3.340887070 4.245373726 5.135000706

H 3.506176472 7.075222969 4.091376305

H 3.909473419 5.674318790 3.078458071

H 2.752500772 6.881019592 2.504148483

C 7.746129036 -5.994100571 -6.812350273

C 7.451496601 -5.405279160 -8.204054832

C 7.530487537 -7.515699387 -6.837197781

C 9.214489937 -5.717124462 -6.476281643

H 7.570001125 -4.316586018 -8.210407257

H 8.139636040 -5.828086376 -8.944959641

H 6.432200909 -5.628739357 -8.534049988

H 6.502710819 -7.777105331 -7.107913017

H 8.196662903 -7.979607105 -7.573388100

H 7.743556023 -7.957937717 -5.858027935

H 9.495387077 -6.129708290 -5.500935078

H 9.857382774 -6.183539391 -7.229843616

H 9.433191299 -4.643908024 -6.475710392

C -3.983657360 0.300903589 -6.038566113

H -5.014808655 0.659550667 -6.084817886

H -4.003363609 -0.779886544 -5.861407757

H -3.504108429 0.758664846 -5.165248871

C 0.284359515 0.215950802 -8.716929436

H 0.903648496 0.746019304 -7.984531403

H 0.432251513 -0.853048563 -8.530422211

H 0.668198466 0.446869582 -9.713387489

C 3.014647961 -4.889290810 -5.446552277

H 2.783886671 -5.650699139 -6.195648670

H 2.445003510 -5.112919807 -4.538188457

H 2.656216383 -3.922275543 -5.821998119

C 6.847455502 -3.059338570 -2.748518229

H 6.460085392 -3.373774290 -1.773269057

H 7.939035892 -3.065185308 -2.699477673

H 6.516523361 -2.025022507 -2.899959803

C 1.243405342 0.717528343 2.609097004

H 1.577733517 0.523025692 3.630904913

H 0.297802359 0.188397765 2.449851274

H 1.975893021 0.276095122 1.922667265

C 0.067870073 4.496396065 -0.505461872

H 0.777518630 4.210677147 -1.290449142

H -0.892922401 4.045992851 -0.776954889

H -0.043879937 5.583070755 -0.527979732

===============================

**TS**

===============================

N -0.085820697 1.772907257 0.318870783

C 0.753162563 1.305253148 -0.642168164

C -1.308073044 1.166121244 0.140848085

C -1.176903725 0.336562097 -0.940203786

N 0.102780998 0.427083760 -1.403340816

H -1.907048941 -0.302765906 -1.413000584

H -2.139597893 1.382491469 0.793951273

C 2.116906643 1.664627433 -0.990006089

C 2.574334145 1.053690791 -2.194538593

C 2.937001705 2.520784378 -0.256398261

C 3.880757570 1.344945788 -2.616600752

C 4.230607033 2.783443451 -0.710516989

C 4.702133179 2.194941759 -1.892329216

H 2.600037575 2.988934994 0.659654140

H 4.248076439 0.913838565 -3.542448759

H 5.707958698 2.418606758 -2.235837936

C 5.059516907 3.661847830 0.048263408

N 5.719358921 4.376928806 0.682570577

C 0.288599074 2.685810089 1.351995587

C 0.158453748 4.060492039 1.117234230

C 0.924655497 2.177124023 2.484559774

C 0.729507327 4.925409317 2.045055389

C 1.478719473 3.088432074 3.385352373

C 1.426099420 4.466933727 3.172142267

H 0.659281433 5.993665218 1.856833339

H 1.995935082 2.693424702 4.253710270

N 3.776639938 -3.446246386 -2.535044432

C 3.165579081 -2.328782320 -3.116860390

C 3.247608423 -3.556963682 -1.243929267

N 2.216212988 -1.831215143 -2.238616467

C 2.315599680 -2.550601006 -1.101463079

H 3.579528570 -4.320497990 -0.556924880

H 1.712851644 -2.320776463 -0.233109459

C 3.441648960 -1.669388056 -4.306052208

C 2.527111053 -0.569010913 -4.592571735

C 4.459909439 -2.010793924 -5.237390995

C 2.639910460 0.062622547 -5.828826904

C 4.501317978 -1.353535891 -6.454402447

H 5.214168072 -2.753590345 -5.011543751

C 3.592416525 -0.320584983 -6.775114536

H 1.985374212 0.897490978 -6.057745934

H 3.665854216 0.180325747 -7.734724045

N 6.297546387 -2.142685652 -8.142317772

C 5.493541718 -1.763362527 -7.394541740

C 5.705948830 -4.857663155 -3.036815405

C 4.414733887 -4.412730694 -3.323028088

C 3.749644995 -4.861464024 -4.520070553

C 6.362226963 -5.643644333 -3.994168520

C 4.488254070 -5.604775429 -5.467590332

C 5.796087742 -5.999529362 -5.238453865

H 7.380998611 -5.945112705 -3.772868156

H 3.982927322 -5.883367538 -6.389096737

Ir 1.265312433 -0.168386325 -3.097399235

C -0.818766654 -0.623342872 -5.077145100

N -1.534724712 -1.452296734 -5.881649017

C -1.402023673 -2.732168674 -5.386329651

N -0.240918189 -1.336556792 -4.110843182

C -0.594606400 -2.644503355 -4.287362099

H -1.893910527 -3.567516804 -5.860265255

H -0.278894633 -3.417930126 -3.606947899

C 0.338101685 1.277178884 -4.156111240

C -0.602509379 0.811773479 -5.118593216

C -1.262927771 1.688918114 -5.975112915

C 0.538376629 2.661213875 -4.064303875

C -1.006449699 3.057225704 -5.878164291

H -1.965101480 1.336295485 -6.721161366

C -0.116484068 3.545230150 -4.911563396

H 1.255357742 3.048387051 -3.345907211

H 0.066831298 4.614002705 -4.847027779

C -1.666139007 3.940457582 -6.784318447

N -2.212338209 4.631843567 -7.541121006

C -2.151829004 -1.096525550 -7.121987343

C -1.346562028 -1.065185189 -8.262894630

C -3.495272160 -0.705838203 -7.143845558

C -1.913315296 -0.590056241 -9.446344376

C -4.010869980 -0.239241153 -8.349664688

C -3.234019041 -0.146386355 -9.512840271

H -1.281155944 -0.546100914 -10.326558113

H -5.046425343 0.090966426 -8.368864059

C 6.398603916 -4.441157341 -1.773661494

H 6.207586288 -3.384944201 -1.557413578

H 6.040853024 -5.018279076 -0.911799192

H 7.478029251 -4.591213226 -1.847273707

C 2.350678921 -4.721440315 -4.679496765

H 1.812962174 -3.978664160 -4.095231533

H 1.925160050 -4.949090481 -5.657188892

C 0.096687451 -1.475895286 -8.202374458

H 0.685377717 -0.778860331 -7.595568657

H 0.216922432 -2.462956667 -7.743875027

H 0.537540078 -1.506218195 -9.201542854

C -4.316424370 -0.714879453 -5.886157990

H -5.363084316 -0.486794949 -6.100377560

H -4.272531033 -1.684860229 -5.379436970

H -3.947005510 0.035683502 -5.176303387

C 1.095809340 0.696156263 2.671842337

H 1.863010883 0.307079643 1.989567876

H 1.411394715 0.466925085 3.692309141

H 0.169456691 0.149878681 2.466832399

C -0.498428464 4.567328453 -0.135753065

H 0.052209575 4.243310452 -1.027489424

H -1.520841599 4.188775063 -0.240521371

H -0.538148999 5.659037113 -0.142576441

C 6.551463127 -6.781229973 -6.311855316

C -3.834562540 0.468741775 -10.778995514

C 2.130887032 5.474358082 4.082888603

C 1.098524213 6.461235046 4.651988506

H 0.344478458 5.940167904 5.251486301

H 1.596185684 7.195744991 5.294441700

H 0.578911424 7.012446404 3.862030506

C 2.850081205 4.794958591 5.251760960

H 3.340563774 5.553979397 5.869075298

H 2.154773712 4.245412827 5.896100998

H 3.626520634 4.104787350 4.904322624

C 3.175875902 6.237658024 3.248284817

H 3.706897736 6.957492352 3.880670547

H 3.915832996 5.558029652 2.812053680

H 2.713259459 6.797400475 2.429300070

C 5.818926334 -8.111974716 -6.558798790

H 4.794832706 -7.951550961 -6.914330482

H 6.342654228 -8.698714256 -7.320924759

H 5.774322033 -8.712327003 -5.642209530

C 7.991274834 -7.089631081 -5.895376682

H 8.032490730 -7.712994576 -4.994995594

H 8.495623589 -7.638965607 -6.696093082

H 8.565061569 -6.174513340 -5.714142799

C 6.579239845 -5.954681873 -7.609282970

H 7.068857193 -4.986857891 -7.460864067

H 7.126240730 -6.498272419 -8.386981964

H 5.573070526 -5.755124092 -7.991344452

C -5.063986301 -0.345631272 -11.213606834

H -5.512580395 0.100717649 -12.107888222

H -4.787012577 -1.378474593 -11.451399803

H -5.834335804 -0.372889161 -10.436479568

C -4.253688812 1.916966081 -10.466700554

H -4.659918785 2.392732382 -11.366283417

H -5.025526047 1.961230040 -9.691857338

H -3.401668072 2.512257814 -10.121510506

C -2.835478783 0.494957238 -11.939204216

H -1.952216625 1.098142982 -11.702587128

H -2.506093025 -0.512053549 -12.219060898

H -3.309328794 0.941788495 -12.819122314

N 1.311250091 -6.889817715 -3.452469826

C 0.902754962 -7.698767185 -4.601595402

C 0.078298137 -6.296811581 -2.954820156

C -0.462763608 -7.520529747 -4.837955475

C 1.732918382 -8.462146759 -5.400692940

C -0.984793961 -6.639548779 -3.794420719

C -1.042326093 -8.151330948 -5.936532497

C -2.250501633 -6.122807980 -3.519835234

C -0.039665252 -5.453701973 -1.865047455

C -2.401881218 -5.280151844 -2.419381618

H -3.101271391 -6.370810032 -4.147943020

C -1.315213084 -4.949791908 -1.602190137

H -3.382522106 -4.869585514 -2.193205833

H -1.460708857 -4.282334805 -0.756967783

H 0.821008742 -5.186274529 -1.256695151

C 1.133496881 -9.089910507 -6.494253159

H 2.790650368 -8.579389572 -5.183591843

C -0.231515586 -8.933600426 -6.756480694

H 1.739089608 -9.709292412 -7.150196552

H -0.668264866 -9.433676720 -7.616714001

H -2.101125956 -8.037630081 -6.150225163

C 2.165624380 -7.561182499 -2.470625877

C 1.578868389 -8.196897507 -1.380348921

C 3.539136648 -7.599061489 -2.680105925

C 2.393916845 -8.861250877 -0.470866114

C 4.342787266 -8.266541481 -1.758868694

C 3.775203466 -8.892066002 -0.653829277

H 0.501960874 -8.172722816 -1.242970824

H 3.986113787 -7.126180172 -3.546709538

H 1.944080591 -9.360030174 0.382549435

H 5.417553425 -8.290535927 -1.915752053

H 4.406046867 -9.409996033 0.063084245

H 1.886065125 -5.958974361 -3.931412220

===============================

**3**

===============================

N -0.189317346 1.737607479 0.174521893

C 0.649717093 1.151519418 -0.718785465

C -1.451911569 1.236367583 -0.049749441

C -1.342193127 0.348694593 -1.085458040

N -0.036467481 0.298938543 -1.477502584

H -2.103937149 -0.244431660 -1.568261862

H -2.293810606 1.559755087 0.542994022

C 2.063652277 1.342764497 -0.985823452

C 2.517321110 0.684166431 -2.166521311

C 2.935207605 2.072779417 -0.181029573

C 3.884407520 0.766839504 -2.471203804

C 4.284389973 2.150172472 -0.531286776

C 4.759850979 1.489063382 -1.673389196

H 2.590302706 2.586876154 0.707756758

H 4.255321026 0.287216127 -3.372534275

H 5.812073708 1.563470364 -1.932765126

C 5.158306122 2.921204567 0.291298777

N 5.845124245 3.558546543 0.977761269

C 0.163361996 2.784331083 1.083863735

C 0.130660653 4.106152534 0.622652113

C 0.626312017 2.447936773 2.356493711

C 0.627878189 5.091711044 1.468225121

C 1.113040924 3.476604700 3.165935040

C 1.151008487 4.803771019 2.734696627

H 0.630145788 6.116460800 1.107194185

H 1.496063948 3.213156939 4.146514416

N 3.234474897 -3.812986135 -2.994391680

C 2.710613966 -2.634652615 -3.499849081

C 2.725642204 -3.979362488 -1.710437298

N 1.848888636 -2.114212036 -2.566989899

C 1.890410423 -2.911949635 -1.475633502

H 3.027751923 -4.804384232 -1.082567215

H 1.325265527 -2.681236506 -0.583828449

C 3.001319408 -1.921111584 -4.667679310

C 2.268323660 -0.660276473 -4.778478146

C 3.898696661 -2.304875612 -5.697240353

C 2.453648806 0.101706296 -5.934019089

C 4.031338215 -1.504321694 -6.816181660

H 4.491731167 -3.206537485 -5.630088806

C 3.308067799 -0.292475402 -6.959812164

H 1.936330318 1.051284790 -6.024512291

H 3.448662281 0.317859054 -7.845027924

N 5.662529469 -2.329947710 -8.647545815

C 4.930557251 -1.941487074 -7.833010197

C 5.365177631 -4.831991196 -3.554077625

C 3.994674683 -4.715269566 -3.769447327

C 3.357433796 -5.394070625 -4.859215736

C 6.118798256 -5.609167576 -4.448029995

C 4.172978401 -6.179183483 -5.713594913

C 5.554240704 -6.255936623 -5.559333801

H 7.190357208 -5.656937122 -4.287399769

H 3.687378407 -6.679449558 -6.547076225

Ir 1.096354008 -0.264728576 -3.220225573

C -1.103344321 -0.200842395 -5.111969471

N -1.956633329 -0.828600943 -5.960907459

C -1.936833143 -2.172713757 -5.656734467

N -0.556609392 -1.099402547 -4.292954445

C -1.059210539 -2.325745344 -4.619888306

H -2.539937973 -2.876776695 -6.209224701

H -0.771678984 -3.219590187 -4.087212563

C 0.365416914 1.405359030 -4.086718082

C -0.700727284 1.191133738 -5.004963398

C -1.280253649 2.246883869 -5.705715656

C 0.812806904 2.720227957 -3.908003807

C -0.804369867 3.542895317 -5.500976563

H -2.087901831 2.088836432 -6.410304070

C 0.244489744 3.779193640 -4.602528095

H 1.647750378 2.912782431 -3.240678072

H 0.613618612 4.792021275 -4.467686176

C -1.388109207 4.612377167 -6.242815971

N -1.876226068 5.463101864 -6.864826679

C -2.577402592 -0.218872651 -7.096234798

C -1.805840254 -0.056139924 -8.249306679

C -3.865935326 0.312788725 -6.974495411

C -2.344621420 0.705899954 -9.287514687

C -4.354669094 1.063695431 -8.038883209

C -3.599638224 1.307481647 -9.194872856

H -1.736747622 0.853223562 -10.173509598

H -5.343138218 1.505075455 -7.941842556

C 6.020496368 -4.092329025 -2.424081087

H 5.695641518 -3.046870232 -2.403209925

H 5.751530170 -4.523549080 -1.451377511

H 7.108559608 -4.116594315 -2.515398264

C 1.972962022 -5.276206493 -5.105369568

H 1.338363647 -4.632058144 -4.509697437

H 1.525875688 -5.794374466 -5.946689606

C -0.416903764 -0.621095240 -8.340662956

H 0.276090026 -0.083532348 -7.682751656

H -0.383015335 -1.672768593 -8.037197113

H -0.032788984 -0.547785044 -9.360708237

C -4.649149418 0.144790292 -5.703469276

H -5.657948017 0.550042808 -5.809969902

H -4.732651234 -0.907816172 -5.413158417

H -4.161756516 0.669688940 -4.872650146

C 0.679637313 1.014439225 2.801224470

H 1.406994462 0.447838098 2.206442118

H 0.974326849 0.941829085 3.850505114

H -0.288884401 0.518840432 2.681823254

C -0.366181612 4.432814598 -0.756338239

H 0.298141092 4.021151543 -1.524526477

H -1.359036803 4.010538101 -0.943373144

H -0.422732681 5.513713360 -0.905088127

C 6.400103092 -6.967072964 -6.618107796

C -4.151526451 2.240345955 -10.274665833

C 1.788568020 5.924816132 3.557433605

C 0.765396059 7.048927307 3.787157536

H -0.103053167 6.682889938 4.345001221

H 1.223216057 7.859515667 4.364524364

H 0.405549198 7.477614880 2.846856117

C 2.282407522 5.433116436 4.919876099

H 2.726336956 6.268009186 5.471172333

H 1.463653564 5.034031391 5.528578758

H 3.053145885 4.661308765 4.819395542

C 2.994972467 6.470501900 2.771157265

H 3.489795208 7.263119221 3.343244791

H 3.730094671 5.682260513 2.575294971

H 2.694308043 6.894536018 1.807882190

C 6.000166893 -8.447513580 -6.692456722

H 4.936100483 -8.577908516 -6.912672520

H 6.568779469 -8.949892044 -7.481764793

H 6.213931084 -8.957987785 -5.746480942

C 7.899143696 -6.881489754 -6.316206932

H 8.155456543 -7.363342285 -5.365647793

H 8.459229469 -7.394715786 -7.103613853

H 8.250083923 -5.844424248 -6.288650513

C 6.137163639 -6.293795586 -7.978407860

H 6.371394157 -5.224533081 -7.950774670

H 6.758362293 -6.758296967 -8.751690865

H 5.092790127 -6.396223545 -8.289839745

C -5.484304905 1.685640812 -10.803881645

H -5.893798828 2.358087301 -11.565614700

H -5.346988201 0.699199975 -11.259573936

H -6.233054638 1.589911819 -10.011337280

C -4.377064228 3.628969431 -9.650004387

H -4.750688553 4.325162888 -10.408978462

H -5.112308502 3.597773075 -8.839952469

H -3.447808027 4.039059162 -9.240559578

C -3.188076496 2.392585039 -11.454405785

H -2.227044582 2.816106319 -11.143426895

H -3.003565788 1.435831666 -11.955224037

H -3.620974779 3.072803259 -12.194774628

N 2.215890884 -7.546505451 -2.958695650

C 2.411444902 -8.715381622 -3.853715658

C 0.761115491 -7.288716793 -3.008442879

C 1.188427329 -9.059988022 -4.432929039

C 3.611307383 -9.334054947 -4.117582798

C 0.165373877 -8.166927338 -3.916458845

C 1.171363950 -10.119614601 -5.343282223

C -1.205656528 -8.031816483 -4.159269333

C 0.095555559 -6.300217152 -2.319433212

C -1.906338692 -7.037298203 -3.483707905

H -1.712045908 -8.688170433 -4.858893871

C -1.276932240 -6.183355331 -2.571812153

H -2.972044468 -6.926038265 -3.663188934

H -1.854511142 -5.428972244 -2.046772003

H 0.611731470 -5.633478642 -1.635140657

C 3.574126720 -10.392148972 -5.031615734

H 4.535197735 -9.023391724 -3.640988588

C 2.367179871 -10.771900177 -5.628308296

H 4.490259647 -10.918470383 -5.277703762

H 2.363677502 -11.598591805 -6.332671165

H 0.245359764 -10.429286003 -5.816460609

C 2.810826302 -7.703571796 -1.624422669

C 2.071166039 -8.296948433 -0.610557914

C 4.130517483 -7.309895992 -1.443769693

C 2.674794197 -8.479555130 0.629083216

C 4.719884872 -7.500382423 -0.197024554

C 3.994017124 -8.083708763 0.837981939

H 1.044767857 -8.603772163 -0.782776117

H 4.690507889 -6.862107754 -2.259603977

H 2.109074116 -8.938434601 1.434261441

H 5.750220299 -7.194848537 -0.041155387

H 4.456062794 -8.229728699 1.809621930

H 2.658603907 -6.739420891 -3.444473982

**Table S4**. Vibrational Frequencies (in cm–1) of the Optimized Geometries

===============================

**1**

===============================

65.32 72.06 78.72 110.46 146.91 195.94

243.99 275.75 283.42 321.29 405.20 413.87

426.50 430.85 440.25 493.07 503.31 556.98

601.85 610.69 621.53 637.57 644.33 707.81

717.05 726.22 760.26 762.94 774.19 782.58

791.95 861.70 890.28 905.48 932.34 958.94

963.19 976.50 977.41 996.82 1003.19 1012.11

1013.61 1019.65 1029.13 1054.56 1060.34 1062.55

1075.70 1128.08 1133.74 1172.41 1199.55 1202.62

1202.98 1222.64 1233.26 1256.05 1306.33 1334.60

1348.47 1360.23 1388.48 1400.18 1445.66 1479.55

1486.88 1501.47 1521.28 1530.72 1542.32 1625.42

1640.91 1643.03 1655.01 1657.03 1691.58 3228.55

3233.31 3233.83 3234.07 3239.34 3242.66 3243.41

3246.84 3249.61 3249.78 3252.93 3258.02 3258.27

===============================

**2**

===============================

12.00 14.09 17.00 17.94 19.73 21.25

24.79 25.45 27.49 31.32 31.93 34.62

39.26 42.28 44.39 50.49 51.37 51.86

77.03 79.38 79.93 82.69 87.81 89.34

91.38 98.54 100.78 104.63 112.65 114.29

116.14 119.94 127.82 128.61 128.75 132.74

138.67 142.97 145.25 153.78 156.50 159.01

159.72 165.40 169.86 184.70 187.05 188.42

200.60 211.18 214.39 232.42 236.55 237.84

241.12 243.77 244.39 246.38 247.10 248.60

252.37 256.28 263.45 271.43 271.91 272.09

281.06 288.97 290.14 290.35 290.89 293.37

296.61 302.03 308.29 316.53 319.21 320.57

324.46 328.39 330.97 334.21 354.84 355.20

355.73 359.89 360.54 376.49 379.04 382.02

383.39 383.58 384.16 405.68 421.68 422.15

422.96 427.67 429.01 429.72 442.86 450.37

451.13 457.47 467.70 472.89 489.12 490.80

508.49 524.00 525.20 526.15 526.28 528.92

541.82 542.96 543.42 547.96 550.43 552.66

554.51 572.70 573.53 574.69 575.43 577.09

592.95 596.83 599.14 602.86 603.02 613.51

621.51 622.91 630.94 633.35 656.58 662.12

662.62 665.75 673.06 673.92 678.22 690.86

704.43 705.44 705.96 728.56 735.08 735.33

753.21 755.86 762.93 763.97 764.52 795.31

798.93 818.72 819.82 820.89 843.53 854.31

854.38 857.21 857.56 860.14 861.62 863.65

866.42 899.72 900.27 901.44 908.72 909.23

910.71 914.05 922.94 926.58 932.98 941.59

943.04 944.01 951.37 951.47 951.97 959.21

960.21 961.40 967.22 967.67 968.53 970.59

972.22 975.32 978.64 978.91 979.95 984.80

994.65 999.01 1007.90 1010.37 1024.90 1025.28

1025.83 1051.51 1053.50 1053.70 1055.05 1055.14

1055.43 1056.03 1057.47 1057.59 1058.67 1059.36

1061.07 1062.50 1063.06 1064.94 1068.02 1070.38

1070.76 1087.79 1101.97 1107.75 1119.53 1120.57

1137.05 1158.10 1167.11 1173.22 1173.93 1181.47

1182.00 1188.56 1190.11 1192.26 1228.84 1229.99

1231.97 1246.72 1246.80 1246.99 1248.89 1249.65

1250.95 1252.58 1266.87 1268.35 1274.40 1275.48

1276.89 1293.64 1295.34 1295.45 1308.67 1312.43

1313.15 1337.16 1338.60 1341.43 1348.61 1354.90

1356.25 1368.40 1370.67 1371.69 1376.03 1379.55

1383.92 1397.43 1407.93 1408.41 1408.67 1411.00

1411.31 1411.46 1411.89 1413.96 1416.41 1420.18

1420.59 1420.91 1426.38 1426.87 1427.31 1440.54

1441.51 1442.84 1443.05 1443.42 1454.88 1466.03

1467.13 1467.21 1474.73 1475.18 1483.42 1489.07

1489.17 1489.44 1489.56 1489.92 1490.02 1490.17

1490.20 1490.39 1490.58 1491.21 1492.83 1492.89

1493.43 1496.50 1496.81 1497.03 1497.41 1508.44

1508.94 1509.61 1515.13 1515.43 1515.52 1518.65

1518.75 1519.01 1524.93 1531.97 1532.39 1533.61

1538.49 1539.54 1553.65 1554.26 1560.34 1563.95

1566.38 1583.75 1593.24 1594.26 1600.01 1602.50

1645.84 1660.77 1665.02 1667.22 1672.41 1675.61

1683.49 1683.86 1685.61 2361.28 2371.57 2372.41

3055.55 3056.36 3056.37 3056.81 3057.84 3057.94

3058.01 3061.86 3061.92 3062.36 3062.69 3062.78

3062.85 3067.05 3068.63 3126.23 3131.18 3131.40

3131.62 3137.13 3138.83 3140.34 3140.61 3140.68

3141.75 3141.92 3142.06 3144.32 3144.38 3144.94

3147.51 3147.62 3147.73 3150.26 3150.83 3151.04

3153.41 3153.43 3154.58 3164.27 3166.25 3166.29

3167.73 3168.38 3169.56 3205.83 3207.05 3207.84

3208.57 3210.36 3212.06 3226.51 3227.79 3230.38

3231.34 3232.15 3242.91 3252.05 3252.58 3258.08

3291.55 3301.05 3302.27 3317.12 3323.60 3324.30

===============================

**2(D)**

===============================

12.05 14.13 17.23 17.98 19.80 21.50

24.70 25.21 27.88 31.31 31.87 34.92

39.11 42.27 44.34 50.14 51.38 51.83

76.56 79.42 79.91 82.73 86.66 89.19

91.15 98.65 100.77 104.65 112.67 114.15

116.40 119.21 122.50 127.78 128.59 130.83

134.29 140.70 145.22 151.04 153.99 156.63

159.04 164.99 169.74 183.48 187.02 188.40

200.45 211.28 214.42 231.84 236.51 237.74

240.87 243.64 244.11 245.59 246.93 248.47

252.30 256.00 263.26 268.26 271.73 271.93

280.38 288.88 290.09 290.21 290.88 293.21

296.03 301.91 308.17 314.09 319.21 320.56

324.34 328.28 330.79 333.83 354.79 355.11

355.76 359.92 360.51 376.47 378.72 381.24

383.36 383.51 384.15 404.09 421.26 422.07

422.23 427.67 428.65 429.60 439.43 449.78

451.11 456.50 467.56 472.60 489.07 490.69

507.02 517.28 524.03 525.18 526.29 528.90

539.99 542.94 543.40 547.47 549.72 552.69

554.50 571.09 572.92 573.62 575.42 577.10

592.55 596.77 599.12 601.73 602.88 610.44

621.16 622.77 630.94 633.33 656.57 662.09

662.66 664.37 673.09 673.95 678.37 691.27

702.51 704.71 705.52 727.35 734.99 735.16

752.81 755.51 757.22 763.96 764.43 795.35

798.88 817.66 819.81 820.87 842.39 854.03

854.18 856.93 859.26 860.10 861.68 863.52

865.65 866.57 900.20 901.40 901.62 909.15

910.63 910.74 918.75 922.87 926.40 933.12

941.57 942.86 944.01 951.36 951.39 951.99

959.47 960.21 961.41 967.15 967.66 968.52

970.50 972.21 975.26 978.90 979.96 985.94

992.69 994.62 998.91 1007.87 1010.36 1015.09

1025.26 1025.85 1051.82 1053.40 1053.73 1054.29

1055.13 1055.41 1056.01 1057.58 1057.85 1058.65

1058.86 1061.03 1061.97 1062.56 1063.03 1070.36

1070.77 1087.18 1101.98 1107.81 1119.48 1120.45

1134.49 1157.92 1166.52 1173.18 1173.87 1181.45

1181.92 1187.26 1189.99 1192.23 1228.05 1229.91

1231.86 1246.72 1246.79 1246.97 1248.53 1249.64

1250.93 1252.10 1266.63 1267.57 1268.33 1275.31

1276.78 1283.86 1295.30 1295.40 1303.10 1309.63

1312.47 1313.11 1326.94 1337.61 1338.77 1341.46

1354.61 1356.06 1357.70 1368.41 1370.74 1372.42

1377.55 1379.57 1383.92 1400.40 1408.13 1408.41

1408.65 1410.99 1411.33 1411.45 1411.86 1413.96

1416.85 1420.22 1420.95 1425.65 1426.30 1426.95

1440.54 1441.47 1442.81 1443.03 1443.38 1457.01

1465.82 1466.02 1467.14 1474.59 1474.91 1475.22

1489.03 1489.13 1489.55 1489.93 1489.98 1490.09

1490.25 1490.43 1490.60 1491.20 1492.66 1492.78

1492.87 1493.36 1496.50 1496.82 1496.98 1502.25

1508.42 1509.00 1515.09 1515.43 1515.47 1518.60

1518.74 1518.96 1522.42 1531.96 1532.35 1533.48

1538.42 1539.56 1553.70 1554.21 1559.26 1563.88

1566.30 1584.30 1593.17 1594.21 1599.99 1602.54

1640.12 1660.64 1665.02 1667.19 1672.42 1675.50

1683.00 1683.49 1685.63 2281.44 2359.84 2371.62

2372.42 3056.37 3056.38 3056.81 3057.84 3057.95

3058.02 3061.88 3061.89 3062.35 3062.70 3062.78

3062.86 3067.03 3068.62 3079.43 3131.20 3131.43

3131.59 3137.11 3138.81 3140.36 3140.61 3140.69

3141.75 3141.93 3142.06 3144.33 3144.38 3144.94

3147.52 3147.62 3147.73 3150.27 3150.83 3151.05

3153.42 3153.44 3154.57 3156.03 3166.26 3166.30

3167.71 3168.38 3169.56 3205.85 3207.06 3207.82

3208.61 3210.39 3212.01 3226.54 3227.76 3230.38

3231.36 3232.15 3242.72 3252.06 3252.55 3258.16

3291.56 3301.07 3302.32 3317.14 3323.61 3324.31

===============================

**TS**

===============================

–669.85 9.57 14.12 16.98 19.13 19.62

21.20 22.42 26.97 27.62 30.24 32.23

35.33 36.20 36.91 38.35 40.99 43.28

45.10 45.92 51.52 51.75 58.15 61.19

68.22 77.14 78.99 80.20 82.01 87.46

89.83 94.25 96.92 98.59 101.03 103.75

111.95 113.26 115.35 120.03 120.65 124.77

129.78 134.25 136.19 137.83 143.62 147.66

149.52 154.11 159.85 161.92 165.74 167.21

171.66 187.25 189.05 192.37 201.63 206.63

211.22 217.09 227.29 233.58 236.60 238.32

240.49 243.01 244.55 245.84 247.53 249.91

251.23 257.26 262.64 269.17 269.28 271.88

273.66 285.16 287.97 289.11 291.32 294.05

295.08 298.93 301.68 308.00 308.49 318.60

319.37 320.11 323.03 323.52 326.21 330.15

340.84 353.84 355.13 357.86 359.48 362.79

373.47 378.21 378.69 381.52 382.69 384.29

397.97 419.36 421.17 422.20 423.68 425.39

426.06 428.48 432.29 435.77 443.05 446.72

448.91 451.65 459.52 463.33 466.93 467.89

483.36 485.94 493.04 495.56 508.59 523.37

524.99 525.87 528.93 529.68 538.28 541.25

542.20 543.62 548.56 551.23 554.18 556.46

569.53 573.04 573.56 574.48 576.92 581.11

594.17 596.00 598.21 603.50 611.65 612.27

620.11 621.93 623.48 625.22 626.32 630.16

632.62 634.98 640.92 646.64 654.40 658.80

663.51 664.60 672.39 674.39 687.99 695.17

696.78 705.28 717.91 730.71 739.97 742.66

743.33 748.48 756.88 759.68 760.79 761.69

762.27 764.72 774.87 778.78 792.77 796.50

797.74 800.51 817.02 819.51 820.36 844.16

847.04 855.06 856.22 860.00 861.59 862.40

864.47 866.14 868.17 869.10 888.42 891.96

895.36 899.98 903.17 904.75 913.60 913.65

916.14 923.85 927.51 930.45 931.48 939.73

942.14 944.43 949.22 951.32 951.55 952.39

957.72 958.56 960.36 961.02 964.14 967.68

968.53 969.02 969.42 971.00 972.38 977.15

979.03 979.53 996.27 998.55 998.74 999.20

1000.66 1006.16 1010.45 1012.77 1014.26 1017.06

1020.74 1024.22 1024.94 1026.25 1026.89 1050.74

1052.51 1054.46 1054.50 1054.57 1054.69 1055.68

1056.59 1057.10 1057.48 1058.61 1059.87 1060.15

1062.88 1063.34 1064.08 1065.09 1067.23 1069.74

1070.21 1092.09 1099.96 1102.22 1107.08 1116.13

1119.64 1127.50 1135.99 1148.29 1155.13 1165.69

1172.90 1173.95 1175.16 1181.65 1185.28 1187.62

1195.05 1195.81 1197.64 1199.62 1206.32 1213.47

1217.29 1220.68 1228.18 1230.54 1234.17 1244.05

1246.24 1246.58 1248.67 1249.24 1250.15 1252.33

1266.10 1267.28 1267.32 1275.65 1276.39 1277.65

1284.34 1294.78 1296.13 1296.21 1308.36 1312.34

1314.94 1316.98 1336.43 1339.64 1341.49 1346.59

1352.25 1354.46 1355.67 1367.75 1370.83 1372.76

1378.78 1379.93 1382.12 1383.45 1390.09 1391.26

1396.15 1406.28 1407.82 1409.57 1409.90 1411.03

1412.11 1412.71 1413.08 1418.19 1420.87 1421.55

1422.50 1426.83 1427.37 1430.60 1433.58 1436.75

1439.64 1439.81 1444.15 1444.53 1444.87 1446.65

1459.60 1465.58 1466.32 1473.24 1473.83 1476.64

1487.13 1488.75 1488.84 1489.50 1490.25 1490.37

1490.61 1490.71 1490.89 1491.08 1492.03 1492.85

1493.82 1494.64 1496.22 1496.30 1497.81 1505.57

1506.37 1508.00 1508.08 1510.90 1513.62 1515.66

1516.14 1517.22 1519.44 1519.64 1519.74 1523.21

1527.22 1530.53 1531.79 1532.30 1533.14 1538.63

1540.92 1543.42 1546.62 1546.83 1553.88 1560.91

1564.87 1571.75 1591.20 1593.08 1594.54 1600.28

1604.01 1607.04 1635.51 1666.11 1666.19 1667.86

1670.37 1670.68 1675.28 1678.03 1679.08 1682.09

1682.33 1687.65 1693.51 2376.30 2379.85 2380.71

3050.72 3054.93 3056.76 3057.71 3059.36 3059.37

3059.38 3059.43 3060.51 3061.90 3063.69 3064.56

3066.63 3068.78 3128.14 3128.62 3130.91 3132.97

3133.01 3138.46 3141.71 3142.46 3142.78 3144.04

3144.17 3144.66 3145.06 3145.97 3146.47 3148.76

3149.55 3150.67 3150.73 3152.15 3152.91 3153.06

3154.23 3158.64 3169.17 3169.72 3170.19 3170.28

3173.31 3207.56 3209.73 3211.36 3212.11 3216.08

3217.02 3217.59 3218.98 3223.47 3225.98 3226.21

3226.55 3228.49 3232.31 3232.63 3233.89 3234.03

3234.87 3236.64 3238.19 3238.69 3240.82 3242.54

3242.98 3250.22 3255.59 3256.01 3256.26 3268.56

3281.14 3302.94 3311.99 3312.52 3324.63 3336.52

===============================

**TS(D)**

===============================

-540.52 9.57 14.12 16.98 19.13 19.62

21.20 22.42 26.96 27.62 30.23 32.23

35.33 36.20 36.90 38.34 40.98 43.28

45.10 45.92 51.52 51.75 58.12 61.17

68.18 77.04 78.88 80.19 82.01 87.46

89.81 94.24 96.88 98.57 101.02 103.74

111.93 113.25 115.34 120.03 120.65 124.71

129.77 134.11 136.19 137.82 143.62 147.66

149.52 154.10 159.83 161.87 165.73 167.20

171.65 187.24 189.05 192.33 201.33 206.63

211.21 217.08 227.25 233.57 236.60 238.28

240.38 242.97 244.44 245.84 247.45 249.91

251.22 257.25 262.63 268.75 269.20 271.86

273.65 285.13 287.97 289.11 291.31 294.04

295.07 298.88 301.62 307.64 308.28 318.59

319.27 319.70 322.95 323.52 326.16 330.12

340.47 353.74 355.13 357.86 359.47 362.79

373.40 376.92 378.20 381.15 382.66 384.28

391.33 419.36 420.93 422.01 423.68 425.27

426.05 428.48 432.13 435.13 442.63 446.16

448.89 451.60 456.92 463.33 466.92 467.86

483.35 485.93 491.33 494.41 507.31 523.37

524.99 525.87 528.89 529.60 535.76 541.25

542.11 543.62 547.63 551.15 553.72 556.45

569.53 571.75 573.04 574.46 576.92 581.06

592.29 595.55 598.19 602.63 607.09 611.62

619.61 621.58 622.19 624.82 625.86 630.00

632.62 633.68 639.42 646.48 652.94 657.02

663.51 664.60 672.39 674.38 684.87 695.11

696.72 705.28 717.69 729.43 739.75 742.32

743.24 748.42 756.81 759.49 760.30 760.78

762.27 764.05 774.17 777.71 792.69 796.50

797.72 800.49 817.02 819.49 820.36 838.57

844.78 855.00 856.21 859.99 861.59 862.33

864.47 866.08 868.16 869.03 875.93 891.89

894.19 899.17 903.17 904.75 908.64 913.56

913.60 916.14 923.85 930.23 931.45 939.72

942.14 944.40 949.21 951.32 951.54 952.39

956.27 958.37 960.36 961.02 964.03 967.61

968.53 969.02 969.17 970.76 972.28 977.14

979.03 979.53 995.48 998.39 998.61 998.86

1000.48 1006.15 1010.40 1012.54 1014.07 1015.98

1017.07 1022.01 1024.23 1024.94 1025.82 1029.78

1049.63 1050.75 1054.44 1054.50 1054.67 1054.70

1056.13 1056.59 1056.84 1057.10 1058.61 1058.77

1059.94 1062.97 1063.37 1064.08 1065.65 1067.84

1069.74 1070.21 1082.81 1085.74 1098.31 1101.81

1107.07 1116.09 1119.64 1126.89 1134.95 1148.38

1155.06 1165.54 1172.75 1173.79 1175.15 1181.64

1185.27 1187.62 1195.05 1195.17 1196.50 1199.70

1203.01 1213.95 1217.15 1217.88 1228.18 1230.53

1234.17 1244.06 1246.24 1246.58 1248.92 1249.24

1250.15 1263.00 1266.13 1267.26 1267.32 1269.74

1275.98 1277.64 1281.58 1294.38 1296.13 1296.21

1308.43 1312.35 1314.94 1320.87 1336.43 1339.64

1342.76 1351.45 1354.46 1354.65 1355.66 1367.75

1370.82 1372.59 1378.82 1379.93 1382.05 1383.44

1390.11 1392.68 1398.48 1406.32 1407.82 1409.57

1409.90 1412.11 1412.70 1413.08 1418.19 1420.87

1421.55 1422.48 1426.83 1427.37 1430.59 1433.59

1436.75 1439.64 1439.81 1444.16 1444.67 1444.87

1447.70 1465.56 1466.32 1472.06 1473.82 1473.99

1487.09 1488.72 1488.82 1489.49 1490.25 1490.37

1490.61 1490.70 1490.89 1491.07 1492.02 1492.71

1492.85 1493.82 1494.69 1496.22 1496.30 1502.24

1504.88 1508.00 1508.06 1510.39 1510.72 1512.97

1515.66 1516.14 1516.89 1519.44 1519.64 1519.74

1524.56 1530.04 1531.78 1532.29 1532.89 1538.62

1540.91 1542.43 1545.66 1546.69 1553.88 1560.90

1564.85 1571.45 1591.19 1593.06 1594.32 1600.28

1604.01 1606.91 1635.34 1666.11 1666.19 1667.42

1670.33 1670.38 1675.28 1676.68 1677.94 1682.09

1682.33 1686.63 1691.85 2376.30 2379.85 2380.71

3050.72 3054.93 3056.76 3057.71 3059.36 3059.37

3059.38 3059.43 3060.51 3061.90 3063.69 3064.56

3066.63 3068.78 3128.14 3128.62 3130.91 3132.97

3133.01 3138.46 3141.71 3142.46 3142.78 3144.01

3144.15 3144.66 3145.06 3145.97 3146.47 3148.76

3149.55 3150.67 3150.73 3152.15 3152.91 3153.06

3154.23 3158.64 3169.17 3169.72 3170.19 3170.28

3173.31 3207.56 3209.73 3211.36 3212.11 3216.08

3217.02 3217.59 3218.98 3223.47 3225.98 3226.21

3226.55 3228.49 3232.31 3232.63 3233.89 3234.03

3234.87 3236.64 3238.19 3238.69 3240.82 3242.54

3242.98 3250.13 3255.59 3256.01 3256.25 3268.56

3281.14 3302.94 3311.99 3312.52 3324.63 3336.52

===============================

**3**

===============================

11.98 16.67 17.90 19.52 21.67 23.08

24.55 25.82 27.75 28.87 30.08 31.99

32.81 35.83 37.32 42.40 42.49 44.57

46.86 49.37 51.17 53.67 55.48 65.54

70.65 76.77 80.97 81.32 87.33 89.84

93.02 95.85 99.41 100.17 102.92 108.23

109.62 111.57 112.25 115.46 116.38 119.88

126.40 128.79 133.20 138.45 143.26 147.17

151.27 152.52 154.14 162.91 165.53 169.28

182.46 186.60 187.00 188.77 198.50 201.00

212.12 217.23 225.55 231.52 235.01 235.76

240.40 241.00 243.90 244.43 248.14 251.94

254.79 256.93 261.90 264.97 271.40 272.35

276.63 282.09 288.54 288.90 289.53 291.96

296.53 301.66 302.08 306.44 309.49 315.04

318.96 319.50 322.04 325.27 326.24 331.46

343.69 355.53 357.15 357.33 359.27 361.01

372.64 376.69 382.11 382.95 383.37 384.80

410.32 418.26 419.90 420.64 422.58 423.88

424.49 425.34 428.91 439.27 442.21 447.94

448.23 448.89 455.85 463.44 463.76 469.15

485.06 485.31 487.60 500.37 518.22 521.53

523.60 524.55 525.59 528.54 537.54 538.82

539.70 544.73 549.51 552.26 555.33 555.62

559.51 567.52 572.77 573.85 577.02 579.72

595.40 597.83 598.49 599.45 608.46 613.50

619.21 621.29 624.86 625.26 626.73 627.29

628.57 631.57 643.77 651.79 662.36 664.45

670.13 671.85 673.19 674.62 686.32 703.27

704.55 708.98 714.00 725.17 735.83 742.54

743.64 744.47 748.06 749.90 758.47 759.59

760.88 762.84 763.44 770.71 771.70 782.66

796.13 799.63 813.71 817.67 820.70 824.93

840.78 856.72 858.90 859.42 860.17 861.42

861.46 863.46 864.68 867.17 869.73 870.51

875.83 877.35 887.03 903.35 903.94 904.08

914.03 914.27 919.17 931.39 933.76 937.11

938.31 939.83 943.02 947.34 949.04 952.35

952.46 952.52 953.96 960.60 960.83 961.93

964.90 968.63 969.63 970.41 971.50 973.45

977.24 980.43 986.39 995.26 996.84 997.76

1000.18 1003.38 1005.84 1006.07 1006.70 1009.68

1014.98 1020.48 1023.54 1025.06 1025.77 1047.46

1051.27 1054.27 1054.35 1054.57 1055.11 1056.30

1056.86 1057.27 1057.53 1058.20 1058.51 1059.45

1062.86 1062.95 1065.25 1067.38 1069.49 1070.50

1087.05 1097.76 1102.72 1106.80 1112.08 1117.19

1119.52 1126.77 1134.60 1144.65 1167.11 1171.13

1173.42 1175.49 1176.43 1178.10 1182.64 1183.47

1190.03 1191.98 1194.11 1197.39 1200.95 1203.25

1210.74 1220.84 1229.09 1230.28 1234.30 1244.68

1246.47 1246.91 1248.36 1249.04 1251.63 1259.21

1266.23 1267.54 1269.45 1275.13 1275.93 1276.99

1283.64 1288.12 1292.39 1296.17 1296.76 1304.48

1312.61 1313.63 1333.76 1336.39 1338.73 1340.73

1342.90 1354.63 1355.93 1366.76 1367.69 1369.10

1371.11 1376.89 1381.94 1383.23 1383.70 1385.91

1395.59 1404.12 1408.95 1409.89 1410.29 1411.08

1412.42 1412.67 1412.71 1413.64 1416.82 1420.93

1421.71 1425.83 1426.98 1427.46 1437.95 1438.38

1441.65 1443.73 1444.49 1444.70 1445.85 1449.06

1459.30 1465.01 1466.74 1473.11 1473.40 1482.16

1485.72 1487.55 1489.40 1489.63 1490.56 1490.72

1490.96 1491.13 1491.19 1491.55 1492.21 1492.42

1493.06 1493.23 1495.57 1496.32 1496.70 1501.39

1504.68 1507.42 1508.21 1509.41 1516.02 1516.03

1518.23 1519.06 1519.83 1519.92 1519.99 1525.00

1528.64 1531.70 1531.93 1532.79 1538.16 1539.28

1540.84 1541.98 1545.99 1546.89 1551.00 1561.94

1564.44 1589.04 1591.92 1594.37 1597.96 1599.30

1606.22 1625.95 1636.04 1644.47 1664.50 1665.36

1667.29 1672.14 1674.62 1676.02 1681.30 1681.68

1683.64 1688.26 2370.75 2381.92 2382.24 3057.53

3058.01 3058.26 3058.34 3060.04 3060.34 3060.64

3060.71 3060.80 3064.63 3064.86 3065.74 3067.32

3070.61 3130.34 3131.42 3132.70 3136.71 3141.32

3141.34 3143.99 3144.12 3144.13 3145.36 3145.83

3146.05 3146.43 3149.06 3150.28 3150.94 3151.20

3151.67 3153.03 3153.52 3154.64 3155.67 3157.32

3160.51 3170.61 3170.65 3170.83 3172.20 3174.86

3205.63 3212.42 3215.29 3216.97 3217.43 3218.14

3219.43 3219.99 3225.41 3227.01 3227.35 3229.18

3232.47 3232.83 3234.03 3234.58 3237.76 3239.38

3239.81 3240.23 3243.22 3243.92 3245.74 3248.55

3249.52 3251.62 3258.11 3259.66 3272.30 3289.86

3300.86 3303.99 3310.53 3315.68 3323.99 3325.61
